# Supplementary material for: SARM1 depletion rescues NMNAT1-dependent photoreceptor cell death and retinal degeneration
Source: eLife. 2020 Oct 27;9:e62027. doi: 10.7554/eLife.62027 (PMC7591247; doi:10.7554/eLife.62027)
Supplement: Figure 1—figure supplement 1—source data 1. [file elife-62027-fig1-figsupp1-data1.xlsx]

## Sheet: Sheet1
Source data
Supplemental Fig1B
RT qPCR. Data from same mouse are grouped by a color.
genotype	mRNA
WT1	1.00484
WT1	1.03471
WT2	0.872867
WT2	1.10189
KO1	0.450933
KO1	0.440307
KO2	0.360789
KO2	0.26002
KO3	0.42778
KO3	0.128096
KO4	0.375545
KO4	0.250182
