# Supplementary material for: SARM1 depletion rescues NMNAT1-dependent photoreceptor cell death and retinal degeneration
Source: eLife. 2020 Oct 27;9:e62027. doi: 10.7554/eLife.62027 (PMC7591247; doi:10.7554/eLife.62027)
Supplement: Figure 1—source data 1. [file elife-62027-fig1-data1.xlsx]

## Sheet: sheet1
Fig1 A B
relative metabolite levels (NAD and NMN). Data from same mice are grouped by a color.
Fig1A			Fig1B
genotype	relative NAD		genotype	relative NMN
WT1	0.742612		WT1	1.2426
WT2	1.29931		WT2	0.949116
WT3	0.958081		WT3	0.80828
KO1	0.933664		KO1	1.65302
KO2	0.654436		KO2	1.33393
KO3	0.619098		KO3	2.16545
Figure 1G
Retina thickness. Data from same mice are grouped by a color.
	WT1	WT2	WT3			cKO1	cKO2	cKO 3
distance from ONH	retina tickness mm	retina tickness mm	retina tickness mm	Average (mm)	SEM	retina tickness mm	retina tickness mm	retina tickness mm	Average (mm)	SEM
-1.8	120	120	180	140	20	30	80	100	70	20.8167
-1.6	140	150	190	160	15.2753	50	100	100	83.3333	16.6667
-1.4	150	140	190	160	15.2753	40	110	100	83.3333	21.8581
-1.2	160	150	200	170	15.2753	40	150	110	100	32.1455
-1	160	160	210	176.667	16.6667	50	130	120	100	25.1661
-0.8	190	180	210	193.333	8.81917	60	140	110	103.333	23.3333
-0.6	220	200	210	210	5.7735	80	150	120	116.667	20.2759
-0.4	220	220	200	213.333	6.66667	90	130	120	113.333	12.0185
-0.2	240	250	180	223.333	21.8581	100	100	110	103.333	3.33333
0	0	0	0	0	0	0	0	0	0	0
0.2	220	220	240	226.667	6.66667	110	110	110	110	0
0.4	240	220	230	230	5.7735	90	120	110	106.667	8.81917
0.6	210	210	230	216.667	6.66667	110	170	80	120	26.4575
0.8	190	190	170	183.333	6.66667	90	150	80	106.667	21.8581
1	190	170	160	173.333	8.81917	90	110	70	90	11.547
1.2	160	160	150	156.667	3.33333	80	100	80	86.6667	6.66667
1.4	150	150	150	150	0	70	80	60	70	5.7735
1.6	140	150	150	146.667	3.33333	70	90	50	70	11.547
1.8	140	140	120	133.333	6.66667	30	70	60	53.3333	12.0185
Figure 1H
Outer nuclear layer thickness. Data from same mice are grouped by a color.
	WT1	WT2	WT3			cKO1	cKO2	cKO 3
distance from ONH	ONL tickness mm	ONL tickness mm	ONL tickness mm	Average (mm)	SEM	ONL tickness mm	ONL tickness mm	ONL tickness mm	Average (mm)	SEM
-1.6	29	36	40	35	3.21455	5	3	8	5.33333	1.45297
-1.4	40	35	47	40.6667	3.4801	7	4	8	6.33333	1.20185
-1.2	46	41	48	45	2.08167	5	6	7	6	0.57735
-1	46	44	45	45	0.57735	8	8	5	7	1
-0.8	50	40	53	47.6667	3.92994	8	11	9	9.33333	0.881917
-0.6	44	41	51	45.3333	2.96273	9	14	20	14.3333	3.1798
-0.4	49	60	47	52	4.04145	8	15	12	11.6667	2.02759
-0.2	47	50	46	47.6667	1.20185	8	17	7	10.6667	3.1798
0	0	0	0	0	0	0	0	0	0	0
0.2	56	54	52	54	1.1547	8	24	6	12.6667	5.696
0.4	56	51	43	50	3.78594	7	19	9	11.6667	3.71184
0.6	48	41	42	43.6667	2.18581	6	18	10	11.3333	3.52767
0.8	48	37	42	42.3333	3.1798	6	18	8	10.6667	3.71184
1	46	38	43	42.3333	2.33333	7	19	14	13.3333	3.4801
1.2	46	33	44	41	4.04145	9	24	11	14.6667	4.70225
1.4	44	41	40	41.6667	1.20185	10	23	9	14	4.50925
1.6	36	38	37	37	0.57735	7	13	14	11.3333	2.18581
