# Supplementary material for: SARM1 depletion rescues NMNAT1-dependent photoreceptor cell death and retinal degeneration
Source: eLife. 2020 Oct 27;9:e62027. doi: 10.7554/eLife.62027 (PMC7591247; doi:10.7554/eLife.62027)
Supplement: Figure 2—figure supplement 1—source data 1. [file elife-62027-fig2-figsupp1-data1.xlsx]

## Sheet: Sheet1
Source data
Supplemental Fig2
ERG. Data from same mouse are grouped by a color.
control							NMNAT3 KO
Scotopic a wave (uV)							Scotopic a wave (uV)
Flash intensity (dB)	control wt mouse 1	control wt mouse 2	control wt mouse 3	mean	SEM		Flash intensity (dB)	NMNAT3 KO mouse 1	NMNAT3 KO mouse 2	NMNAT3 KO mouse 3	mean	SEM
-47	-0.290367	18.417	36.1082	18.0783	10.5087		-47	11.5041	-10.8042	39.0042	13.2347	14.4045
-40	13.0833	25.6811	-4.95687	11.2692	8.89082		-40	2.15478	19.3626	16.2274	12.5816	5.29139
-28	13.7012	35.3499	-3.45785	15.1978	11.2278		-28	0.671795	-2.10287	66.8884	21.8191	22.5489
-20	99.1923	45.9724	35.8215	60.3287	19.6515		-20	32.2734	52.2095	50.1282	44.8703	6.32708
-16	80.974	75.3296	79.3877	78.5638	1.68067		-16	84.9033	70.01	61.6184	72.1772	6.80856
-10	165.4	151.088	219.869	178.786	20.953		-10	132.953	131.254	165.449	143.219	11.126
-4	228.119	242.565	257.566	242.75	8.50101		-4	203.013	199.261	239.495	213.923	12.8319
0	217.171	261.601	300.026	259.599	23.939		0	229.295	232.371	273.424	245.03	14.2249
5	282.806	342.772	363.56	329.712	24.2088		5	360.588	326.484	378.271	355.114	15.198
Scotopic b wave (uV)							Scotopic b wave (uV)
Flash intensity (dB)	control wt mouse 1	control wt mouse 2	control wt mouse 3	mean	SEM		Flash intensity (dB)	NMNAT3 KO mouse 1	NMNAT3 KO mouse 2	NMNAT3 KO mouse 3	mean	SEM
-47	11.442	-1.5625	123.617	44.4987	39.7367		-47	60.0423	108.073	81.8115	83.3089	13.8854
-40	139.958	147.493	181.201	156.217	12.6799		-40	138.322	207.235	216.846	187.467	24.7289
-28	485.229	454.346	535.136	491.57	23.5366		-28	391.602	392.212	558.512	447.442	55.5355
-20	442.301	501.845	594.889	513.012	44.4008		-20	489.095	487.162	678.677	551.645	63.5186
-16	442.301	607.537	704.481	584.773	76.5359		-16	614.421	477.125	759.752	617.099	81.5983
-10	536.784	680.705	723.673	647.054	56.5132		-10	609.09	559.204	834.798	667.697	84.7823
-4	579.508	820.068	831.34	743.639	82.1296		-4	740.072	576.131	865.601	727.268	83.8075
0	623.861	794.23	786.458	734.85	55.5398		0	788.981	730.672	931.478	817.044	59.6416
5	702.393	807.699	890.869	800.32	54.5334		5	850.505	857.096	977.051	894.884	41.1275
Photopic b wave (uV)							Photopic b wave (uV)
Flash intensity (dB)	control wt mouse 1	control wt mouse 2	control wt mouse 3	mean	SEM		Flash intensity (dB)	NMNAT3 KO mouse 1	NMNAT3 KO mouse 2	NMNAT3 KO mouse 3	mean	SEM
-4	84.9162	71.0124	96.7611	84.2299	7.44093		-4	104.447	65.8285	81.368	83.8813	11.2189
0	169.238	125.602	165.271	153.37	13.9313		0	177.144	145.972	136.426	153.181	12.2947
5	187.388	172.18	209.752	189.774	10.9116		5	211.227	199	160.39	190.206	15.32
10	251.899	257.989	290.934	266.941	12.1249		10	314.168	235.921	210.056	253.382	31.297
15	281.738	276.693	288.845	282.426	3.52498		15	264.133	275.472	249.498	263.034	7.5181
20	295.605	265.299	339.437	300.114	21.52		20	287.842	300.96	249.235	279.346	15.5243
25	320.28	328.206	337.305	328.597	4.9185		25	348.649	285.01	290.397	308.019	20.3747
