# Supplementary material for: SARM1 depletion rescues NMNAT1-dependent photoreceptor cell death and retinal degeneration
Source: eLife. 2020 Oct 27;9:e62027. doi: 10.7554/eLife.62027 (PMC7591247; doi:10.7554/eLife.62027)
Supplement: Figure 2—source data 1. [file elife-62027-fig2-data1.xlsx]

## Sheet: Sheet1
Fig2 B										Fig2 C D E
Relative nuclei numbers in the outer nuclear layer. Data from same mouse are grouped by a color.										ERG analysis. Data from same mouse are grouped by a color.
WT	Tmx KO days after tamoxifen									NMNAT1 fl/fl (+) and actin Cre negative with Tamoxifen							NMNAT1 fl/fl (+) actin Cre positive with Tamoxifen								NMNAT1 fl/fl (+) actin Cre positive with vehicle
	19	21	23	25	27	29	33			Scotopic a wave (uV)							Scotopic a wave (uV)								Scotopic a wave (uV)
0.419517	0.786595	0.681715	0.641861	0.339809	0.263152	0.138441	0.0629276			Flash intensity (dB)	mouse 1	mouse 2	mouse 3	mean	SEM		Flash intensity (dB)	mouse4	mouse5	mouse6	mouse7	mean	SEM		Flash intensity (dB)	mouse8	mouse9	mouse10	mean	SEM
0.445737	0.800896	0.572069	0.419517	0.3318	0.264296	0.151026	0.151026			-47	5.83984	-7.85626	31.4233	9.80231	11.5108		-47	4.56396	4.55989	0.79281	5.99918	3.97896	1.11477		-47	-12.6462	19.7357	15.0874	7.39231	10.1087
0.363582	0.724621	0.652582	0.471957	0.556667	0.217826	0.213954	0.125855			-40	-6.6346	2.81559	13.1128	3.09793	5.70233		-40	3.38054	17.9564	5.78044	1.75277	7.21753	3.67394		-40	32.5013	6.93734	19.9761	19.8049	7.38017
0.906157	0.489437	0.33037	0.32916	0.289467	0.276881	0.352394	0.0755131			-28	9.03931	6.30046	6.19792	7.17923	0.930511		-28	8.89282	14.7314	1.49903	0.633144	6.43911	3.32788		-28	10.3682	2.33968	-3.8737	2.94474	4.12241
0.868401	0.702691	0.419517	0.377565	0.239125	0.213954	0.314638	0.0755131			-20	9.68899	27.5479	18.7805	18.6725	5.1557		-20	2.68148	13.8855	7.06652	15.9417	9.8938	3.06216		-20	41.94	35.5882	46.2599	41.2627	3.0992
0.791362	0.31324	0.484058	0.287669	0.25171	0.201368	0.25171	0.151026			-16	17.4167	161.525	36.697	71.8795	45.1669		-16	-0.431324	5.45451	0.358067	16.9562	5.58437	4.00873		-16	99.606	76.216	26.414	67.412	21.5824
0.503421	0.578934	0.47825	0.440493	0.516006	0.276881	0.314638	0.0755131			-10	95.3914	181.3	74.0788	116.924	32.7712		-10	1.89209	-5.88379	10.8097	18.3455	6.29089	5.27025		-10	165.676	134.249	186.033	161.986	15.0622
0.528592	0.553763	0.465664	0.440493	0.289467	0.213954	0.264296	0.125855			-4	148.148	230.387	155.9	178.145	26.2166		-4	-1.63167	-6.01806	14.3221	41.5877	12.065	10.7675		-4	255.161	187.664	175.311	206.045	24.8154
0.503421	0.402737	0.327223	0.327223	0.289467	0.201368	0.201368	0.100684			0	221.029	267.214	190.553	226.265	22.2842		0	-16.7537	38.8973	21.5755	58.9884	25.6769	16.0769		0	297.035	225.98	183.247	235.42	33.185
			0.327223	0.25171						5	278.641	328.125	249.948	285.571	22.8323		5	24.9398	8.50423	14.8112	43.2552	22.8776	7.58925		5	397.285	272.023	279.328	316.212	40.5914
			0.276881	0.314638
			0.314638	0.226539						Scotopic b wave (uV)							Scotopic b wave (uV)								Scotopic b wave (uV)
										Flash intensity (dB)	mouse 1	mouse 2	mouse 3	mean	SEM		Flash intensity (dB)	mouse4	mouse5	mouse6	mouse7	mean	SEM		Flash intensity (dB)	mouse8	mouse9	mouse10	mean	SEM
										-47	77.8971	1.34277	24.1211	34.4537	22.6952		-47	21.1426	70.3613	16.862	17.8304	31.5491	12.9698		-47	145.776	33.5937	75.0895	84.8199	32.7478
										-40	144.816	161.719	35.8236	114.119	39.4509		-40	29.8991	91.5853	24.3001	15.2669	40.2629	17.371		-40	234.611	146.354	127.783	169.583	32.9531
										-28	375.183	445.028	222.087	347.432	65.8363		-28	20.7723	69.1732	62.2355	7.52766	39.9272	15.1922		-28	549.886	395.61	306.925	417.474	70.9836
										-20	413.547	477.973	401.272	430.931	23.7865		-20	53.5753	16.0387	26.279	53.5753	37.3671	9.58844		-20	552.266	438.3	431.247	473.938	39.2171
										-16	451.626	517.883	457.798	475.769	21.1324		-16	47.1327	77.9555	13.3599	31.9078	42.589	13.6622		-16	616.286	492.723	422.16	510.39	56.7311
										-10	504.557	610.718	473.145	529.473	41.6221		-10	11.1084	43.986	14.8519	54.8503	31.1991	10.7771		-10	758.667	534.953	478.841	590.82	85.4722
										-4	527.791	658.081	560.343	582.072	39.1491		-4	46.4274	58.7565	0	69.6208	43.7012	15.3181		-4	803.385	528.89	611.043	647.773	81.3403
										0	583.008	675.334	568.441	608.927	33.4684		0	7.28353	50.2116	44.3929	64.9007	41.6972	12.2558		0	868.856	549.113	564.209	660.726	104.156
										5	672.445	711.507	639.16	674.371	20.907		5	30.1107	56.6406	29.4596	77.474	48.4212	11.5702		5	858.968	618.001	539.795	672.255	96.0477
										Photopic b wave (uV)							Photopic b wave (uV)								Photopic b wave (uV)
										Flash intensity (dB)	mouse 1	mouse 2	mouse 3	mean	SEM		Flash intensity (dB)	mouse4	mouse5	mouse6	mouse7	mean	SEM		Flash intensity (dB)	mouse8	mouse9	mouse10	mean	SEM
										-4	64.2741	83.5449	31.9336	59.9175	15.0573		-4	18.1763	3.74349	8.87858	15.5355	11.5835	3.26426		-4	105.473	27.5594	24.8169	52.6164	26.4401
										0	122.319	37.2762	58.2967	72.6305	25.5743		0	16.4266	34.0169	7.12077	-0.264486	14.3249	7.399		0	196.285	43.3879	67.5415	102.405	47.4551
										5	163.915	112.625	106.995	127.845	18.1081		5	22.6593	36.672	31.7128	0.467937	22.878	8.01346		5	265.584	67.5863	91.334	141.502	62.419
										10	213.081	164.89	164.89	180.953	16.0635		10	20.4943	0.298393	8.85688	2.08876	7.93457	4.57421		10	279.636	85.3136	102.553	155.834	62.1007
										15	261.841	136.8	206.367	201.669	36.1725		15	16.3439	28.9849	14.6213	-0.12207	14.957	5.95956		15	310.682	134.128	94.8758	179.895	66.368
										20	273.844	214.697	202.832	230.458	21.962		20	35.6608	17.2363	21.3053	1.64388	18.9616	6.99545		20	324.919	85.1237	124.056	178.033	74.2979
										25	279.639	216.081	227.93	241.216	19.5133		25	31.9824	41.9108	8.59375	0.602214	20.7723	9.69387		25	327.979	126.986	144.368	199.778	64.2966
