# Supplementary material for: SARM1 depletion rescues NMNAT1-dependent photoreceptor cell death and retinal degeneration
Source: eLife. 2020 Oct 27;9:e62027. doi: 10.7554/eLife.62027 (PMC7591247; doi:10.7554/eLife.62027)
Supplement: Figure 3—figure supplement 1—source data 1. [file elife-62027-fig3-figsupp1-data1.xlsx]

## Sheet: Sheet1
Source data
Supplemental Fig3 DEF
ERG. Data from same mouse are grouped by a color.
GFP control left eye									NMNAT1 right eye
Scotopic a wave (uV)									Scotopic a wave (uV)
Flash intensity (dB)	left control eye mouse 1	left control eye mouse 2	left control eye mouse 3	left control eye mouse 4	left control eye mouse 5	mean	SEM		Flash intensity (dB)	right NMNAT1 eye mouse 1	right NMNAT1 eye mouse 2	right NMNAT1 eye mouse 3	right NMNAT1 eye mouse 4	right NMNAT1 eye mouse 5	mean	SEM
-47	6.58708	11.2422	-10.2096	6.86524	-2.8475	2.32747	3.88695		-47	1.35335	8.5415	1.9375	7.5498	-0.304362	3.81556	1.7726
-40	10.4211	4.88997	1.10417	-8.81267	0.880047	1.69652	3.14465		-40	13.5581	2.86832	2.60042	-10.8615	5.28825	2.69072	3.92778
-28	-3.44605	-3.98071	4.58984	3.41024	-8.28695	-1.54273	2.42065		-28	-2.35636	-4.25171	8.41471	3.75732	-7.05729	-0.298665	2.80993
-20	22.6515	3.39694	19.1881	8.33537	70.5592	24.8262	11.9566		-20	38.5308	18.3939	33.6656	11.0484	62.2284	32.7734	8.889
-16	22.071	33.6378	-8.76126	25.5846	17.7022	18.0469	7.19334		-16	46.11	30.8458	28.5828	15.1964	25.3594	29.2189	4.99944
-10	34.2537	29.6818	34.5256	24.0567	43.9867	33.3009	3.27984		-10	88.9819	32.8158	61.8661	23.1445	72.5132	55.8643	12.2715
-4	11.4738	65.1034	20.4834	16.1777	48.4178	32.3312	10.4142		-4	107.169	65.8146	79.6061	28.7598	96.9218	75.6542	13.7058
0	66.6585	52.9224	52	10.6087	50.6462	46.5672	9.4425		0	167.682	46.5063	125.5	34.5117	109.772	96.7945	24.9254
5	47.8711	75.3988	83	24.432	65.9115	59.3227	10.5142		5	164.22	78.6214	182.8	58.6125	140.842	125.019	24.1747
Scotopic b wave (uV)									Scotopic b wave (uV)
Flash intensity (dB)	left control eye mouse 1	left control eye mouse 2	left control eye mouse 3	left control eye mouse 4	left control eye mouse 5	mean	SEM		Flash intensity (dB)	right NMNAT1 eye mouse 1	right NMNAT1 eye mouse 2	right NMNAT1 eye mouse 3	right NMNAT1 eye mouse 4	right NMNAT1 eye mouse 5	mean	SEM
-47	14.4613	23.5758	101.994	30.5013	35.5306	41.2126	15.6014		-47	6.80338	21.5983	62.4837	29.5736	27.4577	29.5833	9.13685
-40	54.1911	13.1755	18.6849	71.4355	7.16146	32.9297	12.6331		-40	37.1663	7.02311	17.6676	79.7526	5.9733	29.5166	13.7528
-28	46.9157	-2.27864	23.5392	85.673	74.5443	45.6787	16.1622		-28	46.0002	-0.834152	33.8745	91.7969	145.854	63.3382	25.4023
-20	43.5384	20.7859	55.8472	49.5656	147.985	63.5444	21.9242		-20	59.9162	35.7056	53.3719	50.71	196.838	79.3084	29.6489
-16	17.6324	117.832	57.2713	96.0965	41.0292	65.9722	18.2092		-16	48.2517	104.607	42.2499	86.3647	136.583	83.6114	17.6288
-10	95.9473	122.721	105.387	29.3986	76.4635	85.9836	15.9968		-10	115.56	111.491	98.5921	34.5527	170.898	106.219	21.7861
-4	119.385	64.4124	86.3444	46.3867	71.8519	77.6761	12.2548		-4	168.091	73.7712	88.0941	68.5289	214.572	122.611	29.1779
0	136.719	135.05	68.3594	30.9245	217.367	117.684	32.063		0	178.223	135.417	80.8	57.7393	328.125	156.061	47.8825
5	114.665	165.365	89.681	114.339	130.9	122.99	12.4736		5	191.65	160.156	134	146.647	280.884	182.668	26.3627
Photopic b wave (uV)									Photopic b wave (uV)
Flash intensity (dB)	left control eye mouse 1	left control eye mouse 2	left control eye mouse 3	left control eye mouse 4	left control eye mouse 5	mean	SEM		Flash intensity (dB)	right NMNAT1 eye mouse 1	right NMNAT1 eye mouse 2	right NMNAT1 eye mouse 3	right NMNAT1 eye mouse 4	right NMNAT1 eye mouse 5	mean	SEM
-4	78.4871	91.04	31.3924	67.0207	27.6449	59.117	12.6805		-4	79.4474	82.3975	33.3822	58.1217	33.9803	57.4658	10.5754
0	18.9453	32.3893	44.6086	79.4108	25.4273	40.1563	10.6956		0	29.1951	29.3416	35.7178	77.6367	37.9842	41.9751	9.0823
5	37.1704	9.11458	35.8887	58.9701	83.4249	44.9137	12.4573		5	38.6098	15.4216	65.5467	60.6944	87.0768	53.4698	12.2392
10	54.3484	7.3	11.8	62.5949	5.3	28.2687	12.4437		10	71.3704	10	71.7909	64.8329	31.3314	49.8651	12.4499
15	59.9636	16.9	41.5039	66.2299	3.7	37.6595	12.068		15	83.3333	15.6	68.6306	73.9475	39.3338	56.169	12.527
20	27.3112	81.8685	49.707	66.2923	27.5716	50.5501	10.7178		20	63.5742	70.1009	71.5658	78.1413	78.2878	72.334	2.75211
25	147.005	75.1465	17.6107	68.3268	48.5189	71.3216	21.3968		25	160.026	76.5137	88.2324	87.4023	81.4453	98.724	15.4726
