# Supplementary material for: SARM1 depletion rescues NMNAT1-dependent photoreceptor cell death and retinal degeneration
Source: eLife. 2020 Oct 27;9:e62027. doi: 10.7554/eLife.62027 (PMC7591247; doi:10.7554/eLife.62027)
Supplement: Figure 3—source data 1. [file elife-62027-fig3-data1.xlsx]

## Sheet: Sheet1
Fig 3D												Fig 3E												Fig 3F								Fig 3G H I
Retina thickness. Data from same mouse are grouped by a color.												Retina thickness. Data from same mouse are grouped by a color.												Relative nuclei numbers in the outer nuclear layer. Data from same mouse are grouped by a color.								ERG. Data from same mouse are grouped by a color.
	control 1	control 2	control 3	Rho control		Rho Cre1	Rho Cre2	Rho Cre3	Rho Cre				cont 1	cont 2	cont 3	HGRP control		HGRP Cre 1	HGRP Cre 2	HGRP Cre 3	HRGP Cre												Scotopic a wave										Scotopic a wave
distance from ONH	retina tickness mm	retina tickness mm	retina tickness mm	Ave mm	SEM	retina tickness mm	retina tickness mm	retina tickness mm	Ave mm	SEM		distance from ONH	retina tickness mm	retina tickness mm	retina tickness mm	Ave mm	SEM	retina tickness mm	retina tickness mm	retina tickness mm	Ave mm	SEM		WT	Rho Cre	HGRP Cre							control 1	control 2	control 3	control 4	control 5	control 6	mean	SEM			Rho Cre 1	Rho Cre 2	Rho Cre 3	mean	SEM
-1.8	130	80	170	126.667	26.0342	70	80	70	73.3333	3.33333		-1.8	70	130	120	106.667	18.5592	120	120	130	123.333	3.33333		0.970475	0.415918	1.15533						-47	18.8882	-22.0028	18.2617	7.42497	-7.54899	2.39355	2.90278	6.43342		-47	18.0216	7.88997	-3.66797	7.41455	6.26576		-47
-1.6	150	130	190	156.667	17.6383	120	90	90	100	10		-1.6	140	160	160	153.333	6.66667	160	130	160	150	10		1.03979	0.346598	1.01669						-40	-8.01709	-12.5251	3.96778	15.0718	6.33171	23.936	4.79419	5.59515		-40	13.6659	10.2432	-5.19255	6.23882	5.80046		-40
-1.4	180	170	190	180	5.7735	130	90	90	103.333	13.3333		-1.4	150	200	150	166.667	16.6667	190	130	160	160	17.3205		1.27086	0.462131	1.20154						-28	8.49121	0.131027	54.1484	-1.24267	12.7332	17.5228	15.2973	8.30831		-28	52.1008	5.80037	0.666097	19.5224	16.3565		-28
-1.2	200	180	220	200	11.547	120	80	90	96.6667	12.0185		-1.2	180	210	170	186.667	12.0185	190	140	190	173.333	16.6667		1.43261	0.207959	0.970475						-20	61.8876	32.0197	67.4717	37.0361	43.6544	54.0602	49.355	5.75089		-20	2.52075	13.3199	-0.612389	5.07609	4.21997		-20
-1	210	190	240	213.333	14.5297	130	100	100	110	10		-1	210	220	210	213.333	3.33333	240	160	180	193.333	24.037		0.970475	0.184852	1.03979						-16	130.977	94.5943	96.6661	61.7676	78.7591	81.6603	90.7374	9.54699		-16	7.2598	1.36244	1.42958	3.3506	1.95469		-16
-0.8	220	200	220	213.333	6.66667	100	100	80	93.3333	6.66667		-0.8	180	230	230	213.333	16.6667	240	170	190	200	20.8167		1.03979	0.277279	0.993582						-10	229.937	178.648	249.083	155.002	180.959	186.845	196.746	14.4432		-10	25.813	12.6066	50.2686	29.5627	11.0325		-10
-0.6	260	210	240	236.667	14.5297	100	110	100	103.333	3.33333		-0.6	220	240	260	240	11.547	300	180	210	230	36.0555		1.38639	0.138639	1.20154						-4	295.547	296.72	360.262	290.5	298.015	271.457	302.083	12.3085		-4	-5.68115	29.965	-16.7944	2.49647	14.104		-4
-0.4	240	210	230	226.667	8.81917	90	120	120	110	10		-0.4	230	200	260	230	17.3205	320	220	210	250	35.1188		1.15533	0.115533	1.27086						0	352.083	356.442	399.279	366.87	351.261	303.788	354.954	12.5814		0	0.247395	-2.67659	10.8667	2.8125	4.11461		0
-0.2	290	230	180	233.333	31.798	90	120	120	110	10		-0.2	180	200	210	196.667	8.81917	210	210	190	203.333	6.66667		1.27086	0.138639	1.15533						5	404.676	497.524	448.12	445.617	432.616	341.325	428.313	21.3121		5	21.2663	21.3574	0.333658	14.3191	6.99278		5
0	0	0	0	0	0	0	0	0	0	0		0	0	0	0	0	0	0	0	0	0	0		0.970475		1.13222
0.2	270	320	190	260	37.8594	110	130	120	120	5.7735		0.2	210	180	210	200	10	190	190	200	193.333	3.33333		1.03979		1.03979							Scotopic b wave										Scotopic b wave
0.4	250	330	180	253.333	43.3333	90	110	110	103.333	6.66667		0.4	230	250	220	233.333	8.81917	220	210	210	213.333	3.33333		0.970475		1.01669						-47	60.4248	150.96	54.0365	54.4515	121.704	67.2689	84.8077	16.8404		-47	41.0807	45.7682	42.041	42.9633	1.42959		-47
0.6	270	290	200	253.333	27.2845	110	150	90	116.667	17.6383		0.6	240	290	230	253.333	18.5592	220	190	200	203.333	8.81917		0.785623								-40	315.495	331.95	222.786	107.975	161.833	210.946	225.164	35.3623		-40	24.2025	50.179	15.7471	30.0429	10.3597		-40
0.8	250	260	220	243.333	12.0185	110	110	100	106.667	3.33333		0.8	210	280	220	236.667	21.8581	240	190	210	213.333	14.5297		0.785623								-28	543.599	648.458	681.519	361.287	480.55	400.96	519.396	52.9342		-28	51.4933	33.7931	21.6471	35.6445	8.66544		-28
1	240	260	210	236.667	14.5297	110	120	100	110	5.7735		1	210	260	200	223.333	18.5592	180	220	200	200	11.547		0.739409								-20	680.203	719.164	875.448	467.326	643.514	533.617	653.212	58.7133		-20	73.7508	45.3356	122.986	80.6907	22.6827		-20
1.2	200	250	210	220	15.2753	70	90	110	90	11.547		1.2	200	210	180	196.667	8.81917	180	180	190	183.333	3.33333		0.693196								-16	714.383	801.799	893.419	535.177	672.201	594.076	701.842	53.8888		-16	62.3576	18.3784	43.0298	41.2552	12.7267		-16
1.4	190	190	170	183.333	6.66667	60	90	100	83.3333	12.0185		1.4	230	200	170	200	17.3205	160	160	170	163.333	3.33333		0.693196								-10	803.223	889.445	911.051	707.723	749.227	734.782	799.242	34.4897		-10	77.6774	24.821	114.014	72.1707	25.8945		-10
1.6	160	140	180	160	11.547	60	80	70	70	5.7735		1.6	160	170	150	160	5.7735	150	130	160	146.667	8.81917		0.785623								-4	889.242	921.956	1065.92	803.752	806.396	703.817	865.18	50.7823		-4	104.614	58.3496	98.3073	87.0904	14.4853		-4
1.8	140	130	160	143.333	8.81917	30	70	40	46.6667	12.0185		1.8	100	130	90	106.667	12.0185	120	90	150	120	17.3205										0	871.948	968.953	1097.33	863.403	816.284	806.885	904.134	45.2388		0	165.527	65.6738	78.9388	103.38	31.3087		0
																																5	1017.9	1096.6	1146.24	1108.56	962.646	874.186	1034.36	42.0182		5	104.167	72.347	68.1152	81.543	11.3776		5
ONL thickness												ONL thickness
	control 1	control 2	control 3	Rho control		Rho Cre1	Rho Cre2	Rho Cre3	Rho Cre				cont 1	cont 2	cont 3	HGRP control		HGRP Cre 1	HGRP Cre 2	HGRP Cre 3	HRGP Cre												Photopic b wave										Photopic b wave
distance fron ONH	ONL tickness mm	ONL tickness mm	ONL tickness mm	Ave mm	SEM	ONL tickness mm	ONL tickness mm	ONL tickness mm	Ave mm	SEM		distance fron ONH	ONL tickness mm	ONL tickness mm	ONL tickness mm	Ave mm	SEM	ONL tickness mm	ONL tickness mm	ONL tickness mm	Ave mm	SEM										-4	101.868	75.3743	71.9076	106.034	68.8232	105.127	88.189	7.29564		-4	25.5778	40.2751	25.9928	30.6152	4.8314		-4
-1.6	37	45	42	41.3333	2.33333	27	13	4	14.6667	6.69162		-1.6	44	41	42	42.3333	0.881917	41	29	34	34.6667	3.4801										0	93.7907	140.983	76.6805	212.724	131.482	184.302	139.994	21.1893		0	87.3494	58.2723	46.521	64.0476	12.1347		0
-1.4	47	49	50	48.6667	0.881917	21	10	5	12	4.72582		-1.4	43	45	36	41.3333	2.72845	51	33	40	41.3333	5.23874										5	188.848	225.962	125.865	264.303	215.993	223.043	207.336	19.0553		5	60.9131	28.3407	107.193	65.4822	22.8771		5
-1.2	54	51	56	53.6667	1.45297	27	10	6	14.3333	6.43774		-1.2	55	53	36	48	6.02771	53	34	57	48	7.0946										10	175.578	305.908	151.245	421.672	265.734	314.914	272.508	40.542		10	74.4086	51.9884	100.871	75.7559	14.1272		10
-1	60	59	59	59.3333	0.333333	23	8	6	12.3333	5.36449		-1	51	55	59	55	2.3094	74	41	53	56	9.64365										15	264.865	336.399	172.404	402.493	285.848	391.574	308.931	35.3329		15	98.4429	49.3842	60.8317	69.5529	14.8182		15
-0.8	55	59	64	59.3333	2.60342	15	12	3	10	3.60555		-0.8	48	45	50	47.6667	1.45297	60	43	47	50	5.1316										20	251.904	334.993	183.464	469.336	284.31	395.15	319.859	41.9231		20	111.182	47.3145	86.0189	81.505	18.5745		20
-0.6	72	50	44	55.3333	8.51143	18	7	4	9.66667	4.25572		-0.6	63	56	61	60	2.08167	87	48	49	61.3333	12.8366										25	204.232	356.169	213.102	456.055	305.762	373.47	318.132	39.8703		25	68.9453	69.515	96.2891	78.2498	9.02114		25
-0.4	71	63	50	61.3333	6.11919	15	9	5	9.66667	2.90593		-0.4	62	36	47	48.3333	7.5351	93	50	43	62	15.6312
-0.2	81	72	37	63.3333	13.4205	7	9	2	6	2.08167		-0.2	56	22	52	43.3333	10.729	56	68	48	57.3333	5.81187
0	0	0	0	0	0	0	0	0	0	0		0	0	0	0	0	0	0	0	0	0	0
0.2	76	83	53	70.6667	9.06152	7	10	3	6.66667	2.02759		0.2	45	47	52	48	2.08167	41	42	41	41.3333	0.333333
0.4	50	78	51	59.6667	9.17121	8	9	3	6.66667	1.85592		0.4	49	51	52	50.6667	0.881917	48	50	44	47.3333	1.76383
0.6	65	82	46	64.3333	10.3976	9	4	5	6	1.52753		0.6	54	63	44	53.6667	5.48736	50	54	51	51.6667	1.20185
0.8	63	65	44	57.3333	6.69162	5	3	5	4.33333	0.666667		0.8	50	61	51	54	3.51188	51	55	50	52	1.52753
1	54	83	47	61.3333	11.0202	10	6	6	7.33333	1.33333		1	49	59	47	51.6667	3.71184	44	65	46	51.6667	6.69162
1.2	48	85	47	60	12.5033	5	5	3	4.33333	0.666667		1.2	49	48	43	46.6667	1.85592	43	44	41	42.6667	0.881917
1.4	42	40	41	41	0.57735	6	7	4	5.66667	0.881917		1.4	42	33	44	39.6667	3.38296	39	43	36	39.3333	2.02759
1.6	41	37	41	39.6667	1.33333	3	3	4	3.33333	0.333333		1.6	40	34	31	35	2.64575	34	29	39	34	2.88675
[truncated: 5 more columns]
