# Supplementary material for: SARM1 depletion rescues NMNAT1-dependent photoreceptor cell death and retinal degeneration
Source: eLife. 2020 Oct 27;9:e62027. doi: 10.7554/eLife.62027 (PMC7591247; doi:10.7554/eLife.62027)
Supplement: Figure 4—source data 1. [file elife-62027-fig4-data1.xlsx]

## Sheet: Sheet1
source data
Fig4 A B					Fig4 F							Fig4 G							Fig4 H							Fig4 I J k
Metablite data. Data from same mice are grouped by a color.					Retina thickness. Data from same mice are grouped by a color.							ONL thickness. Data from same mice are grouped by a color.							Relative nuclei numbers in the outer nuclear layer. Data from same mouse are grouped by a color.							ERG. Data from same mouse are grouped by a color.
																			control1	1.02674						NMNAT1 WT												NMNAT1 KO:SARM1 KO (dKO)
	NAD	cADPR				NMNAT1 WT 1	NMNAT1 WT 2	NMNAT1 WT 3					NMNAT1 WT 1	NMNAT1 WT 2	NMNAT1 WT 3				control1	1.02674						Scotopic a wave (uV)												Scotopic a wave (uV)
WT1	110.58	0.0072			distance from ONH	retina tickness mm	retina tickness mm	retina tickness mm	Ave mm	SEM		distance from ONH	ONL tickness mm	ONL tickness mm	ONL tickness mm	Ave mm	SEM		control1	0.86631						Flash intensity (dB)	NMNAT1 WT 1	NMNAT1 WT 2	NMNAT1 WT 3	NMNAT1 WT 4	NMNAT1 WT 5	NMNAT1 WT 6	NMNAT1 WT 7	NMNAT1 WT 8	mean	SEM		Flash intensity (dB)	dKO mouse 1	dKO mouse 2	dKO mouse 3	dKO mouse 4	dKO mouse 5	dKO mouse 6	dKO mouse 7	dKO mouse 8	mean	SEM
WT2	111.096	0.012			-1.8	90	97	188	125	31.5647		-1.6	38	42	49	43	3.21455		control1	1.15508						-60	4.8	15.4	14.1	24.4	14.0026	-0.154089	-3.35035	-1.78756	8.42633	3.5276		-60	-9.2	0.9	-6.8	3.9	-1.7	2.57759	17.0607	9.50248	0.962618	3.24043
WT3	126.283	0.0072			-1.6	165	132	191	162.667	17.0717		-1.4	46	40	59	48.3333	5.60753		control1	0.962567						-40	2	27.7	-3.1	23.4	13.6116	5.01529	23.6432	27.1576	14.9285	4.33539		-40	16.6	-3.8	-3.3	13.9	12.1	19.6949	24.4195	0.0687613	11.3735	4.13815
WT4	85.4928	0.0096			-1.4	166	147	216	176.333	20.5778		-1.2	43	45	67	51.6667	7.68838		control1	1.12299						-28	6.3	0.6	3.8	15	19.693	-0.757023	6.58965	18.2149	8.68007	2.80413		-28	5.9	0.9	-0.7	-5.1	2.1	14.3153	3.37094	14.8449	2.96946	2.29438
WT5	96.1824	0.012			-1.2	185	150	233	189.333	24.0578		-1	64	48	67	59.6667	5.89727		control2	0.898396						-20	19.5	-0.1	6.5	30.3	22.0797	0.525721	16.1494	12.4359	13.4238	3.78495		-20	10.7	3.6	10.8	19.1	11	18.4545	25.3548	19.8752	14.1442	2.72959
WT6	110.482	0.0072			-1	240	164	233	212.333	24.251		-0.8	78	52	67	65.6667	7.5351		control2	1.05882						-16	46.2	12.7	3.8	61	48.0065	25.8391	48.2525	58.1127	37.9889	7.5162		-16	46.8	1.7	26.5	26.1	13.5	29.3726	47.0014	35.3925	27.282	6.21168
WT7	94.0896	0.0192			-0.8	259	188	245	230.667	21.7128		-0.6	85	51	71	69	9.86577		control2	0.86631						-10	98.5	23.9	47.8	129.7	87.0522	45.1573	77.1298	87.527	74.5958	12.0204		-10	54.6	2.3	53.7	78.4	58.9	81.9988	75.4687	77.34	57.9096	10.2708
NMNAT1KO 1	60.4656	0.0456			-0.6	266	214	274	251.333	18.809		-0.4	81	54	70	68.3333	7.83865		control2	0.930481						-4	127.9	45.1	64.1	162.9	120.987	76.3954	97.9905	99.1205	99.3117	13.3873		-4	96.2	33.6	77.5	118.7	92.5	122.121	117.044	117.184	93.9521	11.8114
NMNAT1KO 2	25.68	0.0816			-0.4	252	233	269	251.333	10.3976		-0.2	67	59	65	63.6667	2.4037		control2	0.898396						0	144.6	55.7	90.6	210.1	154.393	84.3954	123.547	113.131	122.058	17.0076		0	109.6	48.1	101.3	136	127.9	137.463	144.251	132.329	114.945	12.5926
NMNAT1KO 3	41.1504	0.0912			-0.2	207	233	276	238.667	20.1191		0	0	0		0	0		control2	0.962567						5	158.2	70.9	123.3	272.1	173.797	103.781	177.055	147.312	153.306	21.2551		5	123.3	62.7	125.1	180.1	165.4	179.927	169.588	167.87	143.731	16.258
NMNAT1KO:SARM1 KO 1	66.0672	0.0096			0	0	0	0	0	0		0.2	64	51	65	60	4.50925		control3	0.962567
NMNAT1KO:SARM1 KO 2	65.4072	0.0096			0.2	179	204	227	203.333	13.8604		0.4	57	53	56	55.3333	1.20185		control3	0.994652						Scotopic b wave (uV)												Scotopic b wave (uV)
NMNAT1KO:SARM1 KO 3	76.0344	0.0072			0.4	204	220	225	216.333	6.33333		0.6	67	47	46	53.3333	6.83943		control3	0.994652						Flash intensity (dB)	NMNAT1 WT 1	NMNAT1 WT 2	NMNAT1 WT 3	NMNAT1 WT 4	NMNAT1 WT 5	NMNAT1 WT 6	NMNAT1 WT 7	NMNAT1 WT 8	mean	SEM		Flash intensity (dB)	dKO mouse 1	dKO mouse 2	dKO mouse 3	dKO mouse 4	dKO mouse 5	dKO mouse 6	dKO mouse 7	dKO mouse 8	mean	SEM
NMNAT1KO:SARM1 KO 4	67.0176	0.012			0.6	238	204	216	219.333	9.95546		0.8	81	43	54	59.3333	11.2891		control3	1.09091						-60	12.3	62.7	31.5	77.6	38.4488	32.5837	30.4464	82.8272	46.0508	8.92283		-60	36	34.3	5.6	11.9	16.6	48.3497	12.8191	35.5778	23.6527	5.98987
NMNAT1KO:SARM1 KO 5	94.1784	0.0048			0.8	288	193	219	233.333	28.3451		1	63	42	52	52.3333	6.06447		control3	1.18717						-40	102.7	45.1	2.2	104.4	72.5971	39.8341	58.0484	92.1613	64.6301	12.5282		-40	98	28.9	33.6	61.4	42.4	71.3137	93.8313	70.3405	61.3493	10.5556
NMNAT1KO:SARM1 KO 6	109.07	0.0096			1	252	178	218	216	21.3854		1.2	45	41	52	46	3.21455		control3	0.994652						-28	167.7	66.3	72.6	167.3	142.359	82.8462	112.388	97.8877	113.673	14.4852		-28	106.8	42	114.7	161	86.4	118.283	138.029	120.599	109.602	14.3655
					1.2	210	156	202	189.333	16.8259		1.4	49	30	51	43.3333	6.69162		NMNA1cKO:SARM1 KO1	1.02674						-20	243.1	63.9	103.4	270.7	216.581	118.847	138.952	222.043	172.19	26.5912		-20	199.4	46.6	134.6	174.9	126.8	154.1	187.315	196.555	146.245	19.4189
					1.4	191	130	179	166.667	18.6577		1.6	43	30	50	41	5.85947		NMNA1cKO:SARM1 KO1	0.994652						-16	246.3	95.1	118.4	289.6	244.154	149.109	165.154	263.013	196.354	25.8611		-16	231.4	65.9	174.9	245.4	171	236.989	218.55	236.747	192.02	23.7885
					1.6	175	115	192	160.667	23.3548									NMNA1cKO:SARM1 KO1	0.994652						-10	310.1	120.9	162.6	400.1	321.719	189.355	244.194	302.627	256.45	33.2038		-10	280.7	75.5	219.3	295.1	235.3	297.272	294.136	320.306	242.472	30.2258
					1.8	183	85	123	130.333	28.5268			NMNAT1 cKO:SARM1 KO 1	NMNAT1 cKO:SARM1 KO 2	NMNAT1 cKO:SARM1 KO 3				NMNA1cKO:SARM1 KO1	1.15508						-4	360.3	155.6	209.2	465.2	377.804	232.302	296.415	344.852	305.209	35.973		-4	316.9	112.4	249.9	353.6	321.6	358.455	344.623	356.231	293.925	33.2662
												distance from ONH	ONL tickness mm	ONL tickness mm	ONL tickness mm	Ave mm	SEM		NMNA1cKO:SARM1 KO1	1.02674						0	373.3	189.4	239.9	520.4	404.242	260.765	353.239	356.899	337.268	37.1195		0	343.3	121.7	270.6	380.4	362.2	400.104	365.087	387.96	320.485	36.5745
												-1.6	65	45	51	53.6667	5.92546		NMNA1cKO:SARM1 KO1	0.962567						5	415.1	186.6	286	591.6	444.218	301.325	416.057	392.887	379.223	43.099		5	375.7	165.3	304.7	423.3	418.6	446.866	399.651	427.864	362.017	37.0787
												-1.4	68	46	53	55.6667	6.48931		NMNA1cKO:SARM1 KO2	0.641711
						NMNAT1 cKO:SARM1 KO 1	NMNAT1 cKO:SARM1 KO 2	NMNAT1 cKO:SARM1 KO 3				-1.2	60	37	60	52.3333	7.66667		NMNA1cKO:SARM1 KO2	0.994652						Photopic b wave (uV)												Photopic b wave (uV)
					distance from ONH	retina tickness mm	retina tickness mm	retina tickness mm	Ave mm	SEM		-1	62	43	65	56.6667	6.88799		NMNA1cKO:SARM1 KO2	0.86631						Flash intensity (dB)	NMNAT1 WT 1	NMNAT1 WT 2	NMNAT1 WT 3	NMNAT1 WT 4	NMNAT1 WT 5	NMNAT1 WT 6	NMNAT1 WT 7	NMNAT1 WT 8	mean	SEM		Flash intensity (dB)	dKO mouse 1	dKO mouse 2	dKO mouse 3	dKO mouse 4	dKO mouse 5	dKO mouse 6	dKO mouse 7	dKO mouse 8	mean	SEM
					-1.8	219	129	173	173.667	25.9829		-0.8	57	43	63	54.3333	5.92546		NMNA1cKO:SARM1 KO2	0.86631						-4	14.6	11.9	25.6	20	36.9	25.4	33.6	15	22.875	3.23136		-4	22.7	26.1	20	28.9	16.4	27.1	23.8	20.3	23.5714	1.6347
					-1.6	221	143	169	177.667	22.9298		-0.6	60	53	81	64.6667	8.41295		NMNA1cKO:SARM1 KO2	0.737968						0	35.5	21	50.1	24.9	36.7	51.3	54.7	29.9	38.0125	4.50466		0	53.1	20.8	24.9	61.5	41.7	35	37.8	37.8	39.2571	5.47587
					-1.4	229	159	172	186.667	21.4968		-0.4	60	68	66	64.6667	2.4037		NMNA1cKO:SARM1 KO2	0.834225						5	48.2	38.3	66.3	46.8	65.4	56.5	84.5	65.2	58.9	5.14622		5	61	49.3	46.8	93.1	45.6	55.1	49.5	59.4	57.2	6.30963
					-1.2	228	166	193	195.667	17.9475		-0.2	52	65	75	64	6.65833		NMNA1cKO:SARM1 KO3	0.962567						10	85.4	51.6	67.6	48.6	68	61.1	96.3	99.9	72.3125	6.89923		10	76.6	96.8	48.6	93.8	68.7	77.6	54.9	88.8	73.8571	6.84787
					-1	216	164	190	190	15.0111		0	0	0	0	0	0		NMNA1cKO:SARM1 KO3	0.930481						15	95.2	52.7	67.7	78.9	83.7	82.7	122.8	113.1	87.1	8.0998		15	77.5	91.2	78.9	115.3	62.4	102.6	93.8	124.1	88.8143	6.62985
					-0.8	212	179	219	203.333	12.3333		0.2	52	68	74	64.6667	6.56591		NMNA1cKO:SARM1 KO3	0.962567						20	108.4	77.9	88.9	75	85.3	94.1	136	122.5	98.5125	7.72592		20	113	129.6	75	116	62.4	114.8	96.3	135.1	101.014	9.21367
					-0.6	214	229	279	240.667	19.6497		0.4	53	72	51	58.6667	6.69162		NMNA1cKO:SARM1 KO3	0.962567						25	118.4	86.3	109.6	114.3	102.7	97.4	154.2	121	112.987	7.15416		25	118.3	136.3	114.3	136.1	72.7	112.6	105	150	113.614	8.15313
					-0.4	226	231	281	246	17.5594		0.6	57	64	47	56	4.93288		NMNA1cKO:SARM1 KO3	0.994652
					-0.2	179	236	301	238.667	35.2436		0.8	55	53	53	53.6667	0.666667		NMNA1cKO:SARM1 KO3	0.834225
					0	0	0	0	0	0		1	52	49	60	53.6667	3.28295
					0.2	192	265	230	229	21.0792		1.2	51	49	57	52.3333	2.4037
					0.4	208	271	206	228.333	21.3411		1.4	49	48	51	49.3333	0.881917
					0.6	229	299	225	251	24.0278		1.6	45	46	53	48	2.51661
					0.8	236	208	202	215.333	10.4775
					1	193	206	201	200	3.78594
					1.2	199	201	211	203.667	3.71184
					1.4	190	170	187	182.333	6.22718
					1.6	174	161	183	172.667	6.38575
					1.8	170	142	125	145.667	13.1191
[truncated: 6 more columns]
